# Supplementary material for: Molecular Characterization of the Sea Urchin Larva Photosensory System: Insights Into the Evolution of a Go-Opsin Positive Neuronal Population
Source: Preprints.org preprint supplement (doi:10.20944/preprints202308.0376.v1), 2023-08-04
Supplement: Supplementary file 3 [file supplementary]

**Molecular characterization of the sea urchin larva photosensory system: Insights into the evolution of a Go-Opsin positive neuronal population**

**Maria Cocurullo†, Periklis Paganos†, Rossella Annunziata, Danila Voronov and Maria Ina Arnone,***

Department of Biology and Evolution of Marine Organisms, Stazione Zoologica Anton Dohrn, Villa Comunale, 80121, Naples, Italy; [maria.cocurullo@szn.it](mailto:maria.cocurullo@szn.it), [periklis.paganos@szn.it](mailto:periklis.paganos@szn.it), [miarnone@szn.it](mailto:miarnone@szn.it).

*Correspondence: [miarnone@szn.it](mailto:mia.arnone@szn.it)

**†**These authors contributed equally

Table S Primers used to clone the gene of interests

| **Gene name** | **Primer sequence** | |
| --- | --- | --- |
| Sp-Opsin3.2 | Sp- Opsin3.2F | CGCCCTCTACCTGACCTTAG |
| Sp- Opsin3.2R | ATTTAGGTGACACTATAGGCGCGAAAACTCTGCTGATA |
| Sp-Trh | Sp-TrhF | Clones gifted by Oliveri’s lab (UCL) |
| Sp-TrhR | Clones gifted by Oliveri’s lab (UCL) |
